# Supplementary material for: Community composition of arbuscular mycorrhizal fungi associated with native plants growing in a petroleum‐polluted soil of the Amazon region of Ecuador
Source: PubMed Central journal article supplement (PMC6529925; doi:10.1002/mbo3.703), 2018-08-16

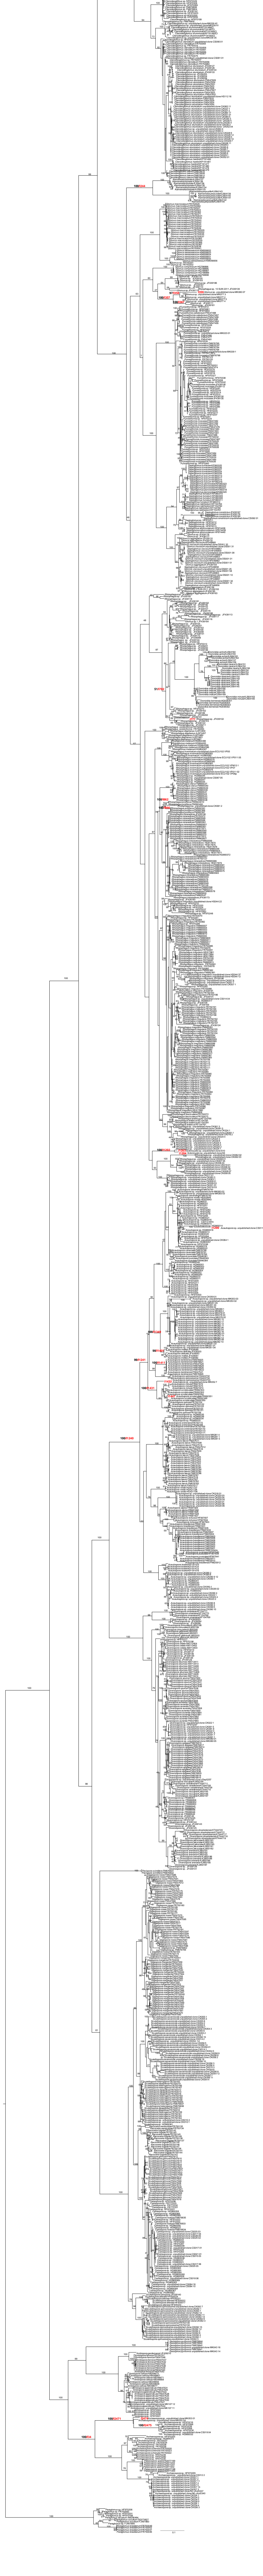

Supplement: MBO3-8-e00703-s001.pdf [file MBO3-8-e00703-s001.pdf]
